# Supplementary material for: Monitoring cytosolic and ER Zn2+ in stimulated breast cancer cells using genetically encoded FRET sensors
Source: Royal Society of Chemistry journal article supplement (doi:10.1039/c5mt00257e), 2015-12-24
Supplement: c5mt00257e1.pdf [file c5mt00257e1.pdf]

## *Supplementary Information*

### **Monitoring Cytosolic and ER Zn<sup>2+</sup> in Stimulated Breast Cancer Cells using Genetically Encoded FRET Sensors**

Anne M. Hessels<sup>a</sup>, Kathryn M. Taylor<sup>b</sup>, and Maarten Merkx<sup>a\*</sup>

<sup>a</sup>Laboratory of Chemical Biology and Institute of Complex Molecular Systems (ICMS),  
Department of Biomedical Engineering, Eindhoven University of Technology, Eindhoven, The  
Netherlands. <sup>b</sup>Breast Cancer Molecular Pharmacology Group, School of Pharmacy and  
Pharmaceutical Sciences, Cardiff University, Cardiff, UK.

\* corresponding author: [m.merkx@tue.nl](mailto:m.merkx@tue.nl)

Supplementary figures

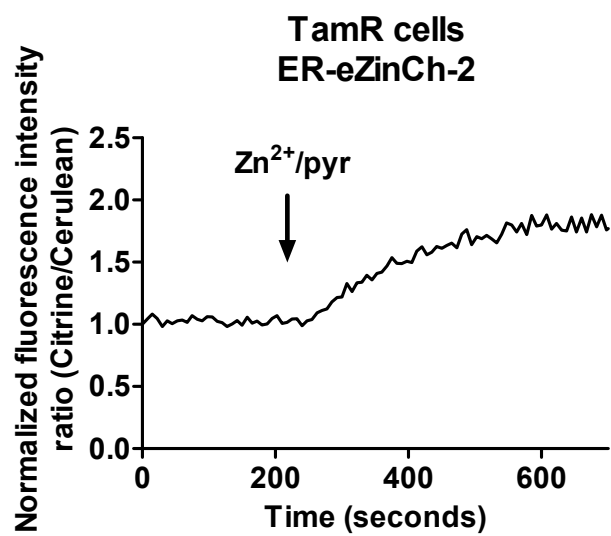

**Figure S1:** Response of TamR cell expressing ER-eZinCh-2 to the addition of 20  $\mu\text{M}$   $\text{Zn}^{2+}$ /10  $\mu\text{M}$  pyrithione.

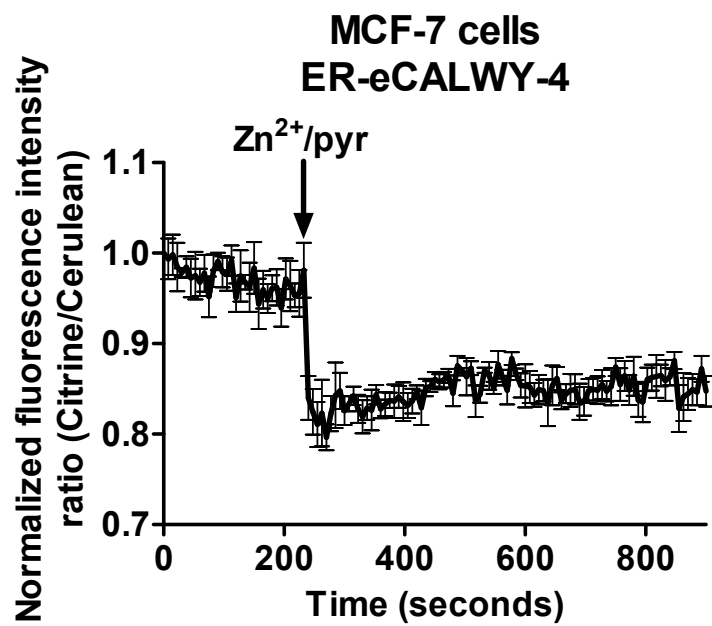

**Figure S2:** Responses of MCF-7 cells expressing ER-eCALWY-4 to the addition of 20  $\mu\text{M}$   $\text{Zn}^{2+}$ /10  $\mu\text{M}$  pyrithione. Traces represent the average of three cells after normalization at  $t=0$  s. Error bars represent SEM.
